# Supplementary material
Source: publisher site journal article supplement (https://www.dovepress.com/article/239662)

**Supplementary material Chemical structure of ERI**


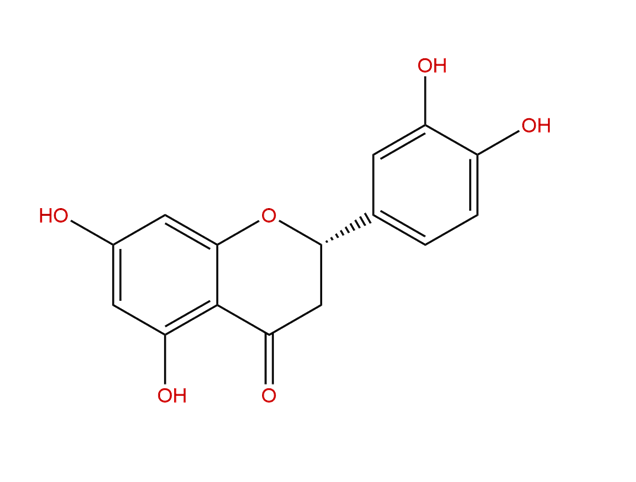

Supplement: Supplementary file 1 [file get_supplementary_file.php]
